# Supplementary material for: Aged Pericarpium Citri Reticulatae ‘Chachi’ Attenuates Oxidative Damage Induced by tert-Butyl Hydroperoxide (t-BHP) in HepG2 Cells
Source: MDPI journal article supplement (doi:10.3390/foods11030273), 2022-01-20
Supplement: s1 [file s1]

## Supplementary Materials

**Table S1:** Calibration curve data for nine reference standards by HPLC

|                                         | $\lambda$ (nm) | RT<br>(min) | Concentration<br>range (mg/L) | Regression<br>equation <sup>a</sup> | R <sup>2</sup> | LOQ <sup>b</sup><br>(mg/L) | LOD <sup>b</sup><br>(mg/L) | Precision<br>(RSD %, n=6) |       | Repeatability<br>(RSD %, n=6) |       | Recovery<br>(%, n=6) |        | Recovery<br>(RSD %, n=6) |       |
|-----------------------------------------|----------------|-------------|-------------------------------|-------------------------------------|----------------|----------------------------|----------------------------|---------------------------|-------|-------------------------------|-------|----------------------|--------|--------------------------|-------|
|                                         |                |             |                               |                                     |                |                            |                            | Intra                     | Inter | Free                          | Bound | Free                 | Bound  | Free                     | Bound |
| Hesperidin                              | 280            | 9.71        | 4.77-610.56                   | Y = 29239x - 94574                  | 1              | 2.55                       | 0.77                       | 0.15                      | 1.72  | 2.83                          | 0.96  | 99.13                | 101.49 | 0.93                     | 1.75  |
| Isosinensetin                           | 330            | 26.19       | 0.29-37.24                    | Y = 31002x - 21553                  | 0.9999         | 0.16                       | 0.05                       | 1.25                      | 1.00  | 0.75                          | 4.06  | 99.13                | 99.01  | 0.93                     | 1.79  |
| Sinensetin                              | 330            | 30.95       | 0.29-37.24                    | Y = 39319x - 25690                  | 0.9999         | 0.16                       | 0.05                       | 0.36                      | 0.53  | 0.58                          | 3.07  | 100.10               | 100.99 | 0.92                     | 1.75  |
| 5,7,8,4'-<br>Tetramethoxyflavone        | 330            | 32.71       | 0.27-34.23                    | Y = 37986x - 23186                  | 0.9999         | 0.14                       | 0.04                       | 1.42                      | 1.76  | 1.24                          | 3.69  | 101.00               | 99.33  | 0.91                     | 1.78  |
| Nobiletin                               | 330            | 36.45       | 1.89-241.43                   | Y = 70725x - 154751                 | 0.9999         | 1.01                       | 0.30                       | 0.17                      | 1.92  | 0.46                          | 1.29  | 100.35               | 102.50 | 0.92                     | 1.73  |
| 5,6,7,4'-<br>Tetramethoxyflavone        | 330            | 38.12       | 0.27-34.23                    | Y = 76182x - 37481                  | 0.9999         | 0.14                       | 0.04                       | 0.69                      | 0.99  | 0.97                          | 4.42  | 99.71                | 101.51 | 0.93                     | 1.74  |
| 3,5,6,7,8,3',4'-<br>Heptamethoxyflavone | 330            | 40.12       | 0.34-43.24                    | Y = 49410x - 28659                  | 0.9999         | 0.18                       | 0.05                       | 0.55                      | 1.68  | 0.63                          | 1.65  | 100.01               | 97.40  | 0.92                     | 1.82  |
| Tangeretin                              | 330            | 43.70       | 1.75-223.42                   | Y = 51739x - 112431                 | 0.9999         | 0.93                       | 0.28                       | 0.11                      | 1.60  | 0.50                          | 0.81  | 100.01               | 98.61  | 0.92                     | 1.80  |
| 5-Demethylnobiletin                     | 330            | 46.22       | 0.30-38.84                    | Y= 51751x - 25413                   | 0.9998         | 0.16                       | 0.05                       | 0.09                      | 1.23  | 0.43                          | 3.12  | 102.08               | 98.17  | 0.90                     | 1.80  |

<sup>a</sup> Where x and Y denote the corresponding injection concentration ( $\mu\text{mol/L}$ ) and peak area of the samples respectively. <sup>b</sup> The LOQ and LOD were

determined by SNR (signal-to-noise ratio) method.

**Table S2:** Exact values of p between nine free, bound and total flavonoids in PCR-C10 and other samples (by Duncan’s test and Tamhane’s test)

|                                     | Fresh |       |       | PCR-C01 |       |       | PCR-C03 |       |       | PCR-C05 |       |       |
|-------------------------------------|-------|-------|-------|---------|-------|-------|---------|-------|-------|---------|-------|-------|
|                                     | Free  | Bound | Total | Free    | Bound | Total | Free    | Bound | Total | Free    | Bound | Total |
| Hesperidin                          | 0.026 | 0.000 | 0.562 | 0.007   | 0.017 | 0.018 | 0.031   | 0.002 | 0.002 | 0.088   | 0.000 | 0.001 |
| Isosinensetin                       | 0.000 | nd    | 0.034 | 0.000   | 0.005 | 0.013 | 0.000   | 0.002 | 0.000 | 0.000   | nd    | 0.009 |
| Sinensetin                          | 0.000 | 0.001 | 0.034 | 0.000   | 0.005 | 0.008 | 0.000   | 0.002 | 0.001 | 0.000   | 0.001 | 0.015 |
| 5,7,8,4'-Tetramethoxyflavone        | 0.000 | nd    | 0.012 | 0.000   | 0.002 | 0.000 | 0.000   | 0.002 | 0.000 | 0.000   | 0.001 | 0.000 |
| Nobiletin                           | 0.000 | 0.000 | 0.000 | 0.000   | 0.000 | 0.000 | 0.000   | 0.001 | 0.000 | 0.000   | 0.000 | 0.000 |
| 5,6,7,4'-Tetramethoxyflavone        | 0.000 | nd    | 0.000 | 0.000   | 0.026 | 0.000 | 0.000   | 0.026 | 0.000 | 0.000   | nd    | 0.000 |
| 3,5,6,7,8,3',4'-Heptamethoxyflavone | 0.002 | nd    | 0.038 | 0.000   | 0.001 | 0.012 | 0.000   | 0.008 | 0.002 | 0.000   | nd    | 0.013 |
| Tangeretin                          | 0.000 | 0.000 | 0.000 | 0.000   | 0.000 | 0.000 | 0.000   | 0.000 | 0.000 | 0.000   | 0.000 | 0.000 |
| 5-Demethylnobiletin                 | 0.000 | 0.002 | 0.031 | 0.000   | 0.005 | 0.030 | 0.000   | 0.017 | 0.021 | 0.000   | 0.001 | 0.019 |
| PMFs                                | 0.000 | 0.000 | 0.000 | 0.000   | 0.000 | 0.000 | 0.000   | 0.000 | 0.000 | 0.000   | 0.000 | 0.000 |

nd, not detected in the samples, so the significance analysis was not available.

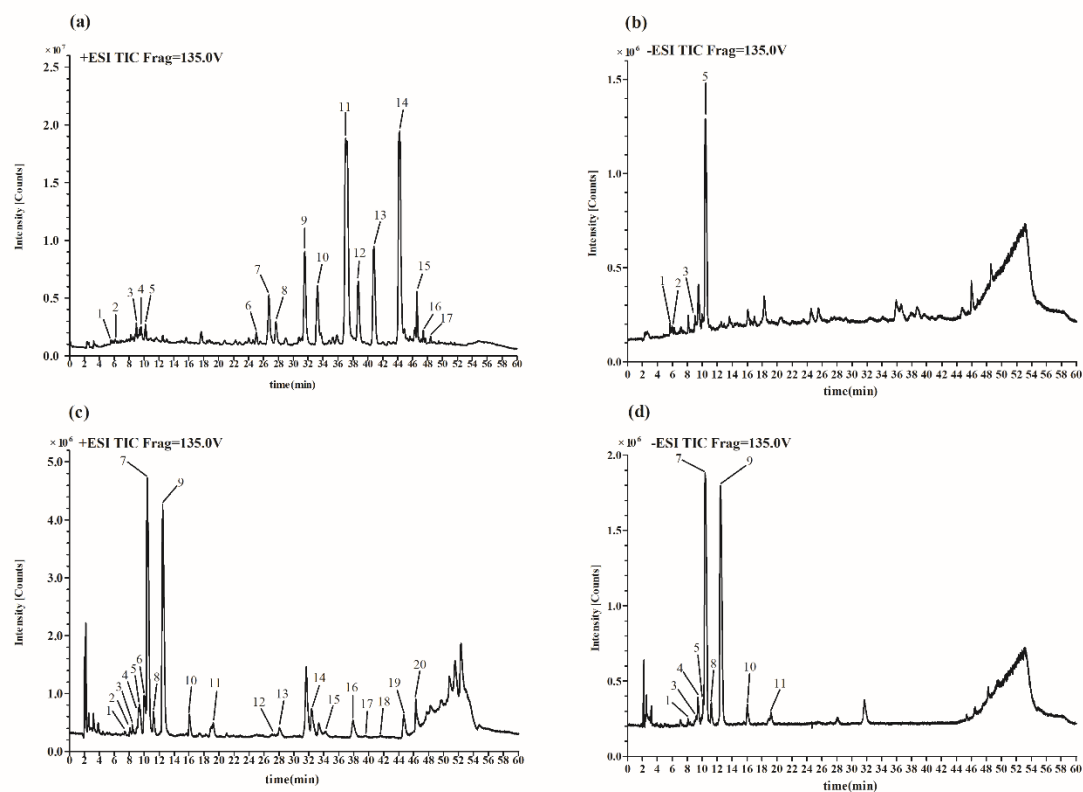

**Figure S1.** The total ion current (TIC) chromatograms corresponding to positive and negative signals of the free (a and b) and bound (c and d) flavonoids of PCR-C

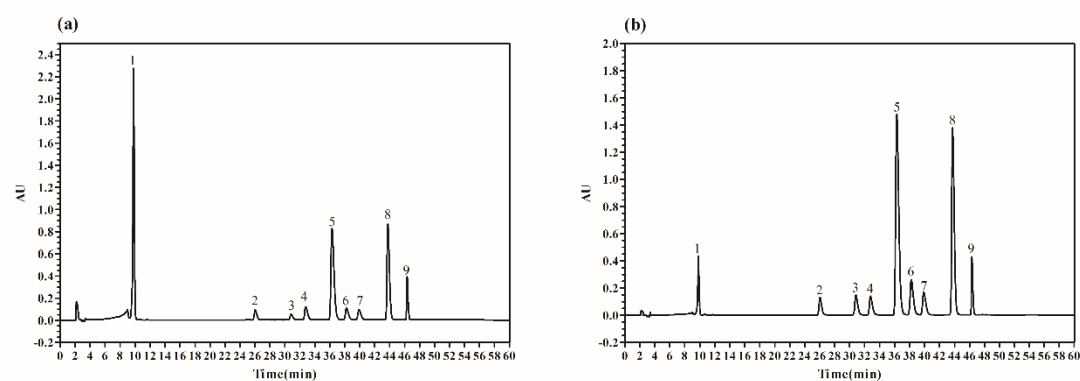

**Figure S2.** Chromatogram of nine flavonoids standards at 280 (a) and 330nm (b). (1) Hesperidin, (2) Isosinensetin, (3) Sinensetin, (4) 5,7,8,4'-Tetramethoxyflavone, (5) Nobiletin, (6) 5,6,7,4'-Tetramethoxyflavone, (7) 3,5,6,7,8,3',4'-Heptamethoxyflavone, (8) Tangeretin, (9) 5-Demethylnobiletin
